# Supplementary material
Source: PubMed Central journal article supplement (PMC4558652)
Supplement: supp_tpc.114.132704_tpc132704_Supplemental.pdf [file supp_tpc.114.132704_tpc132704_Supplemental.pdf]

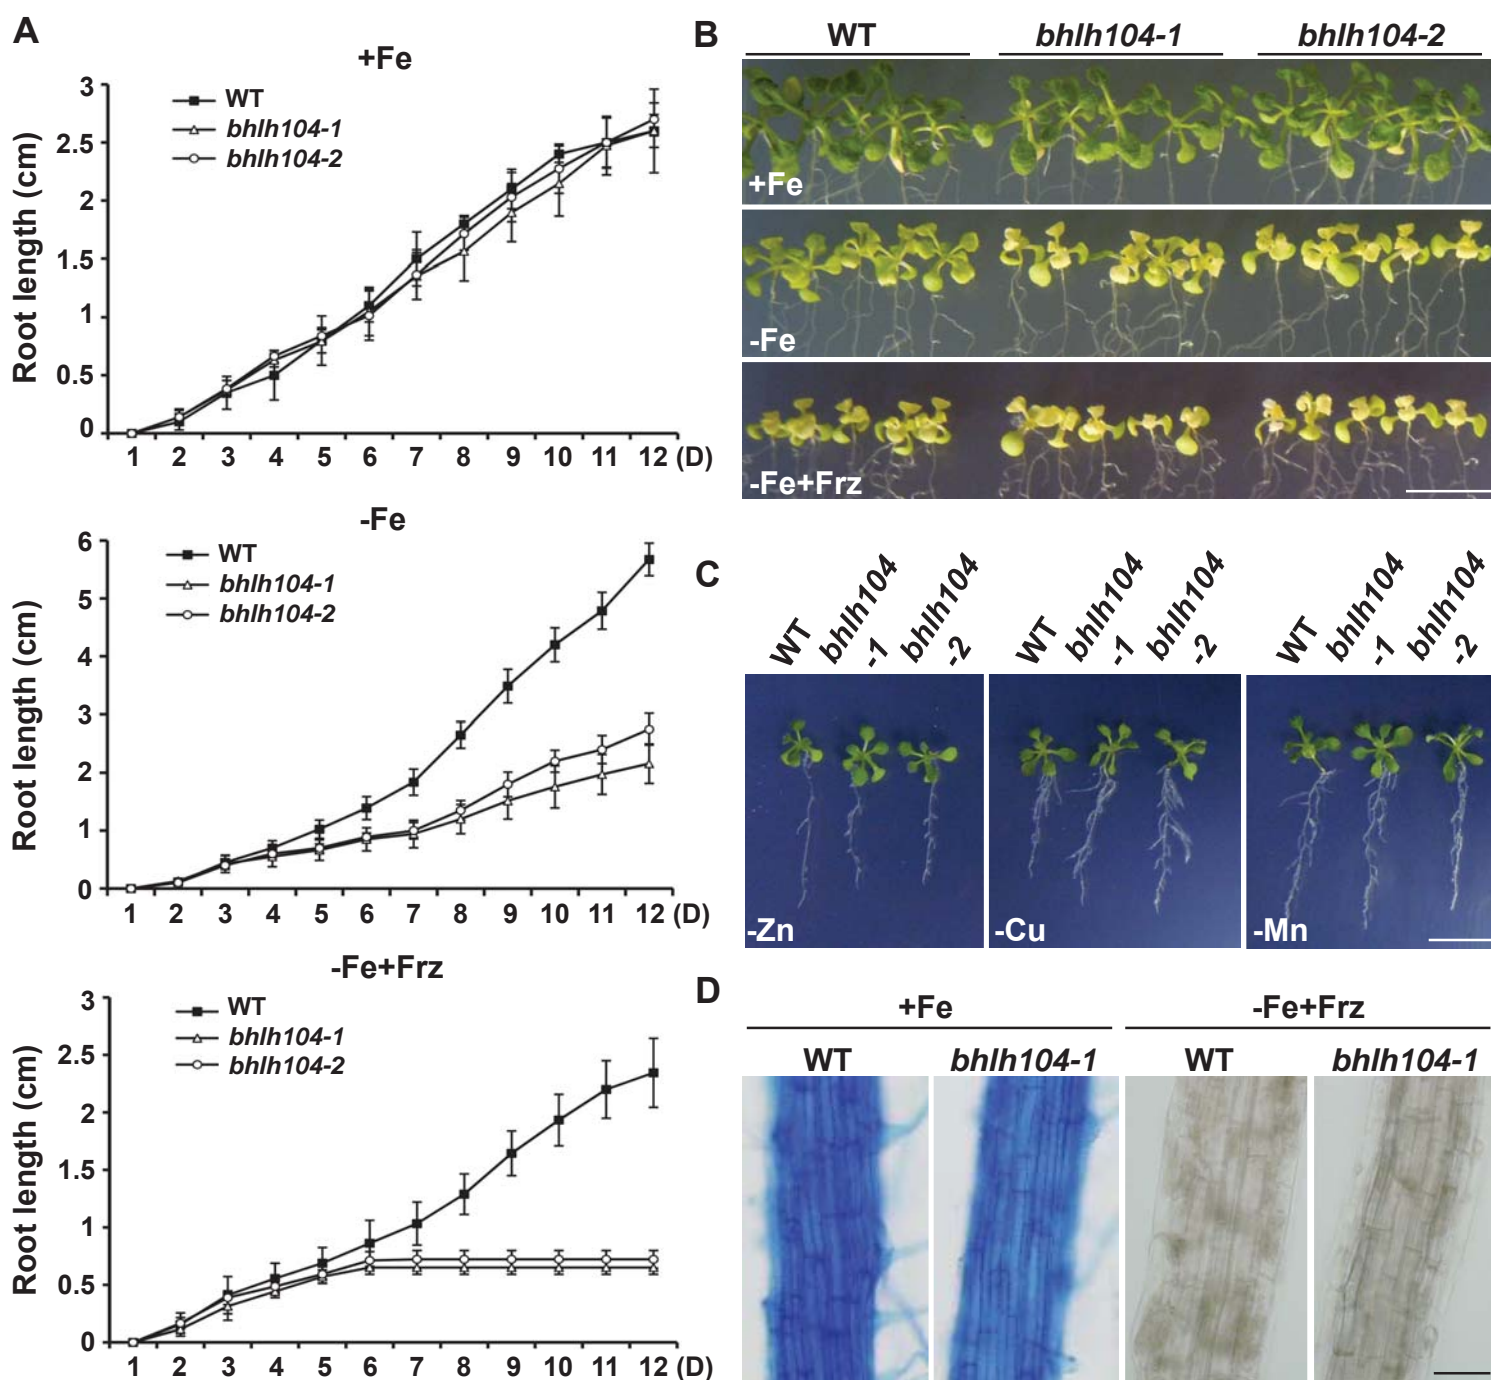

### Supplemental Figure 1. Phenotypic Analyses of WT, *bhlh104-1* and *bhlh104-2* in Response to Fe Deficiency.

(A) Time course quantification of root length of WT and *bhlh104* mutants on Fe-sufficient (+Fe) or Fe-deficient (-Fe and -Fe+Frz) media. Values are means  $\pm$  SD of ten plants for every line. (B) Phenotypes of WT, *bhlh104-1* and *bhlh104-2* plants germinated and grown on Fe-sufficient media for 4 days and then shifted to Fe-sufficient (+Fe) or Fe-deficient (-Fe and -Fe+Frz) media for 10 days. Bar = 1 cm. (C) Phenotypes of WT, *bhlh104-1* and *bhlh104-2* plants germinated and grown on Zn-, Cu-, Mn-deficient media (-Zn, 1/2 MS media without ZnSO<sub>4</sub>; -Cu, 1/2 MS media without CuSO<sub>4</sub>; -Mn, 1/2 MS media without MnSO<sub>4</sub>) for two weeks. Bar = 1 cm. (D) Perls Fe stain in roots of 7-day-old WT and *bhlh104-1* plants germinated and grown on Fe-sufficient (+Fe) or Fe-deficient (-Fe+Frz) media. Bar = 100  $\mu$ m.

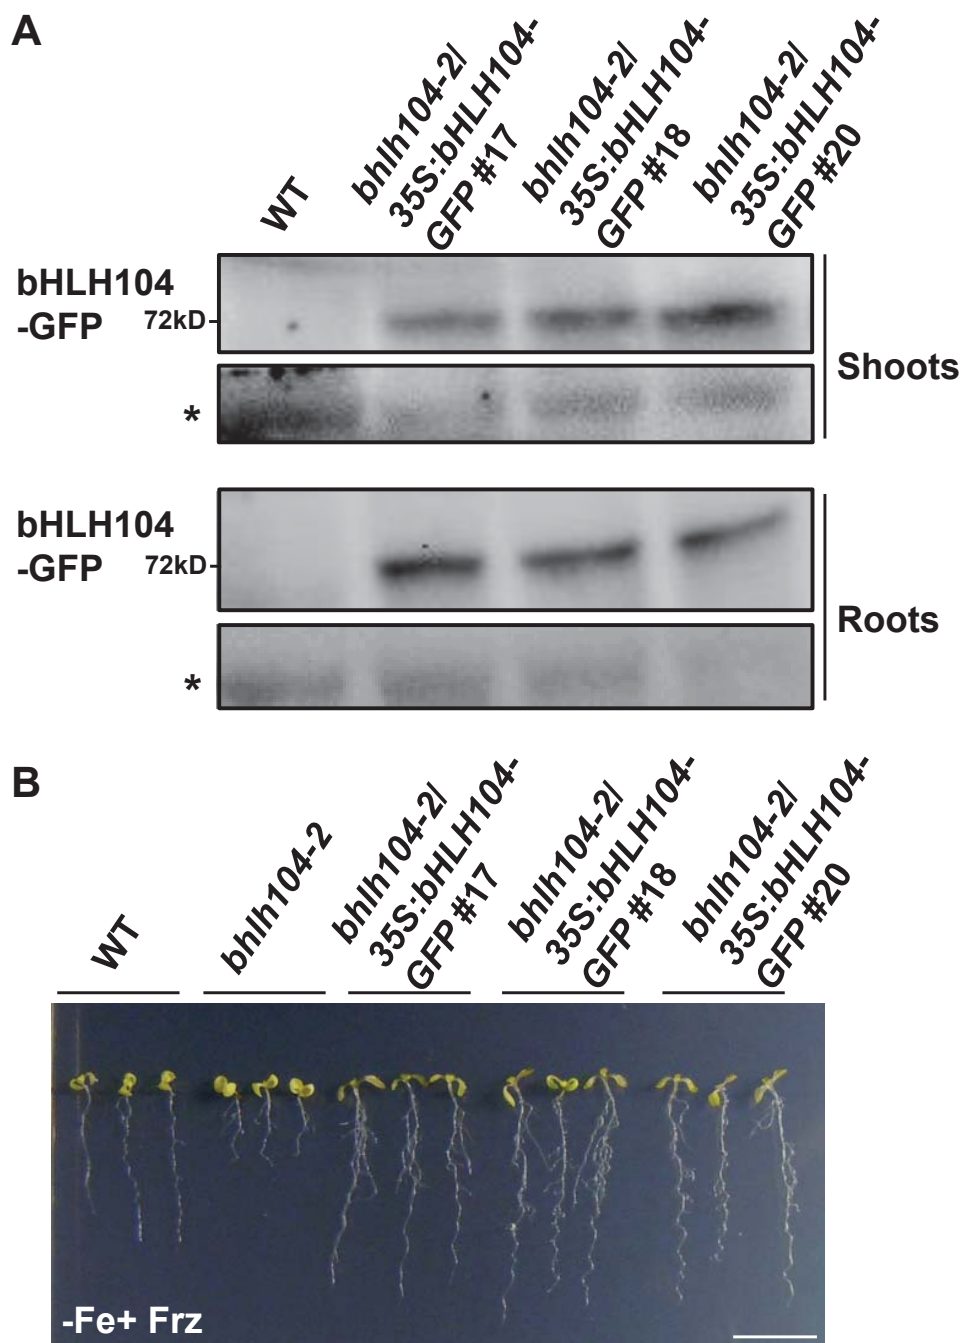

**Supplemental Figure 2. Phenotypic Analyses of WT and *bhlh104-2* Complemented Plants in Response to Fe Deficiency.**

(A) Levels of bHLH104-GFP fusion protein in shoots and roots of 7-day-old *bhlh104-2* complemented plants grown on 1/2 MS media, as determined by immunoblot analysis using an anti-GFP antibody. The asterisks label the non-specific signal used as loading control. (B) Phenotypes of WT and *bhlh104-2* complemented plants grown for two weeks on Fe-deficient (-Fe+Frz) media. Bar = 1 cm.

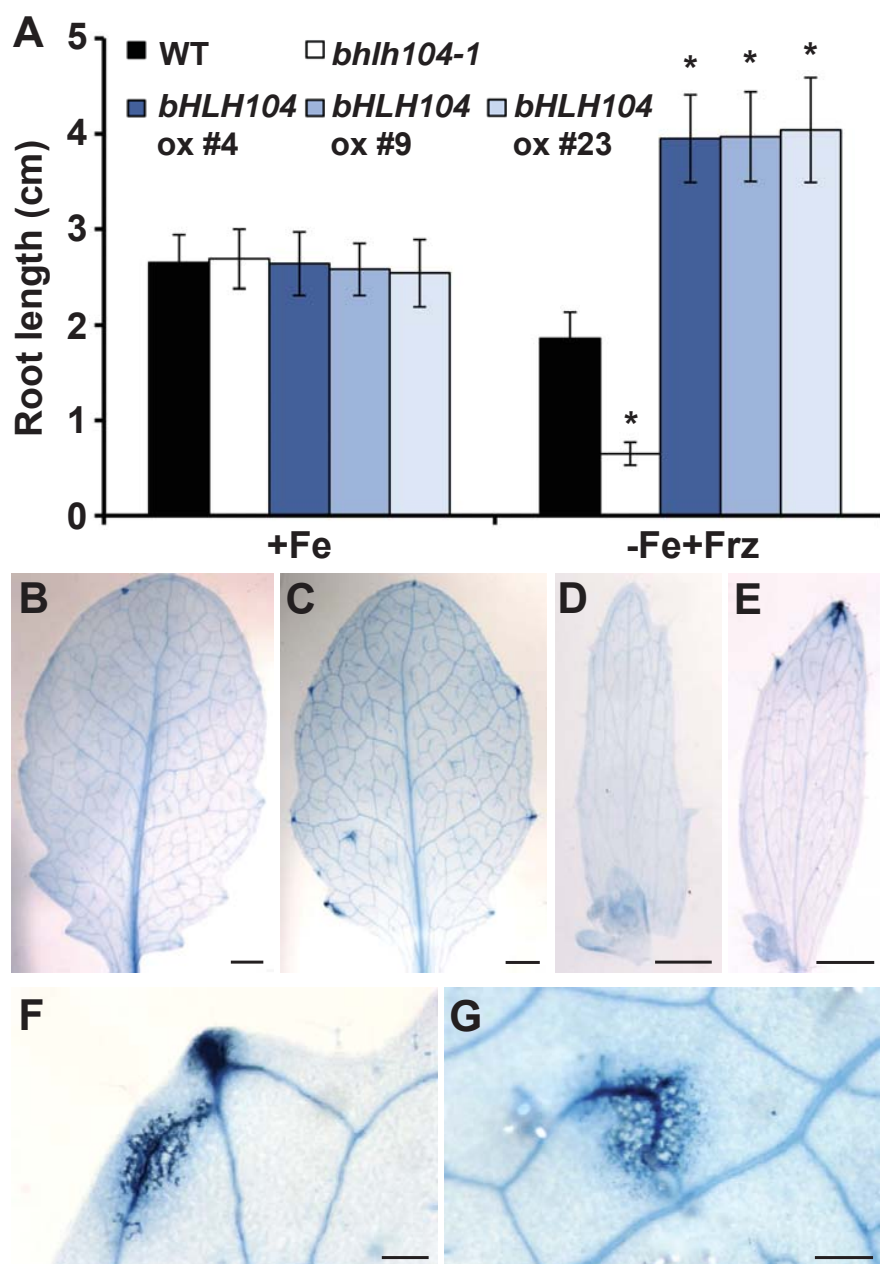

**Supplemental Figure 3. Quantification of Root Length of *bHLH104* ox Plants and Trypan Blue Staining of Necrosis in *bHLH104* ox Leaves.**

**(A)** Quantification of root length of WT, *bhlh104* mutants and *bHLH104* ox plants grown on Fe-sufficient (+Fe) or Fe-deficient (-Fe+Frz) media for two weeks. Values are means  $\pm$  SD of ten plants for every line. Significant differences from the WT are indicated by \* ( $P < 0.05$ ), as determined by Student's *t* test. **(B-G)** Trypan blue staining of WT (B and D) and *bHLH104* ox (C, E, F and G) leaves. Bars = 1 mm in B, C, D and E; 200  $\mu$ m in F and G.

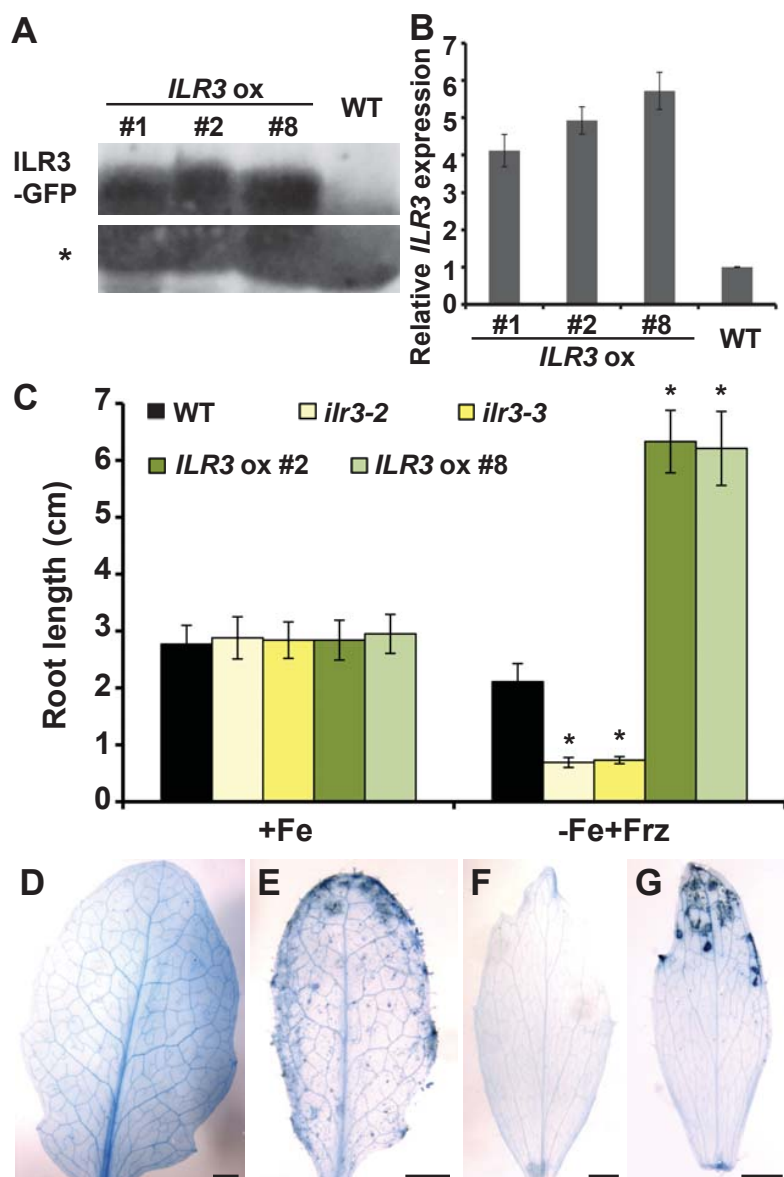

**Supplemental Figure 4. Identification of *ILR3 ox* Plants and Trypan Blue Staining of Necrosis in *ILR3 ox* Leaves.**

(A) Level of the *ILR3*-GFP fusion protein in 4-week-old soil-grown *ILR3 ox* plants, as determined by immunoblot analysis using an anti-GFP antibody. The asterisk labels the non-specific signal used as loading control. (B) Determination of *ILR3* expression in *ILR3 ox* plants grown for four weeks in normal soil, assessed by qPCR. Values are means  $\pm$  SD of three independent experiments. (C) Quantification of root length of WT, *ilr3* mutants and *ILR3 ox* plants grown on Fe-sufficient (+Fe) or Fe-deficient (-Fe+Frz) media for two weeks. Significant differences from the WT are indicated by \* ( $P < 0.05$ ), as determined by Student's *t* test. (D-G) Trypan blue staining of WT (D and F) and *ILR3 ox* (E and G) leaves. Bars = 1 mm.



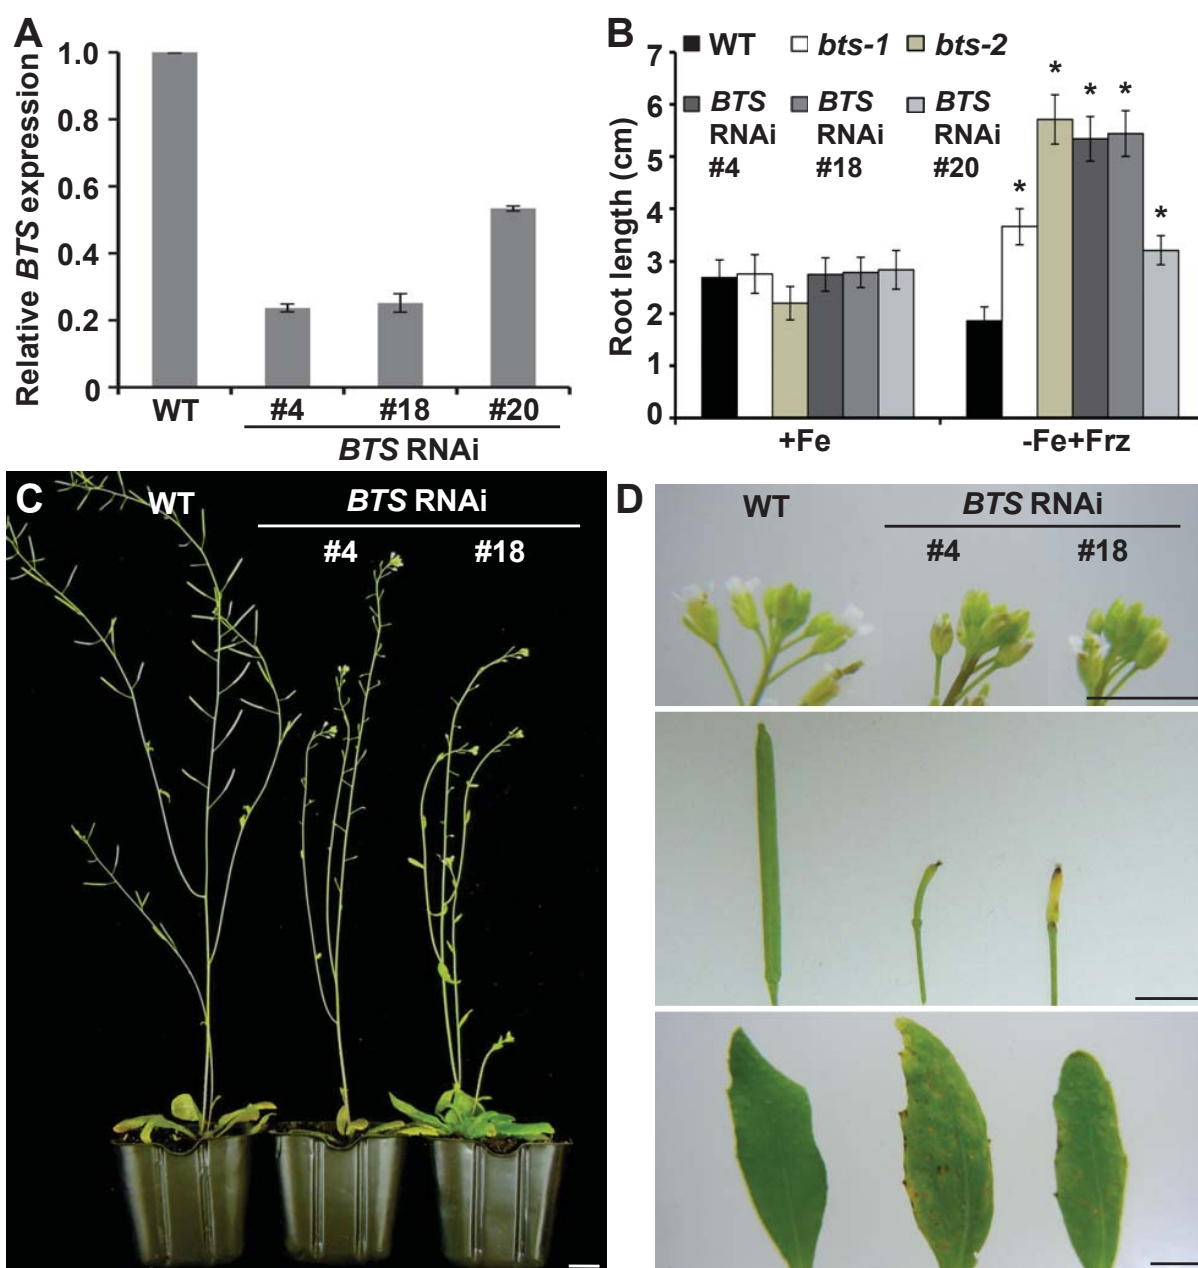

### Supplemental Figure 5. Plants Silenced with *BTS* Exhibit Reduced Fertility.

(A) Determination of *BTS* expression in WT and *BTS* RNAi plants grown for four weeks in normal soil, assessed by qPCR. Values are means  $\pm$  SD of three independent experiments. (B) Quantification of root length of WT, *BTS* RNAi and *bts-2* plants grown on Fe-sufficient (+Fe) or Fe-deficient (-Fe+Frz) media for two weeks. Significant differences from the WT are indicated by \* ( $P < 0.05$ ), as determined by Student's *t* test. (C) Phenotypes of WT and *BTS* RNAi plants at the reproductive stage. The *BTS* RNAi plants showed obviously decreased fertility compared with the WT. Bar = 1 cm. (D) The magnification picture of flowers, siliques and cauline leaves in WT and *BTS* RNAi plants. Bars = 500  $\mu$ m.

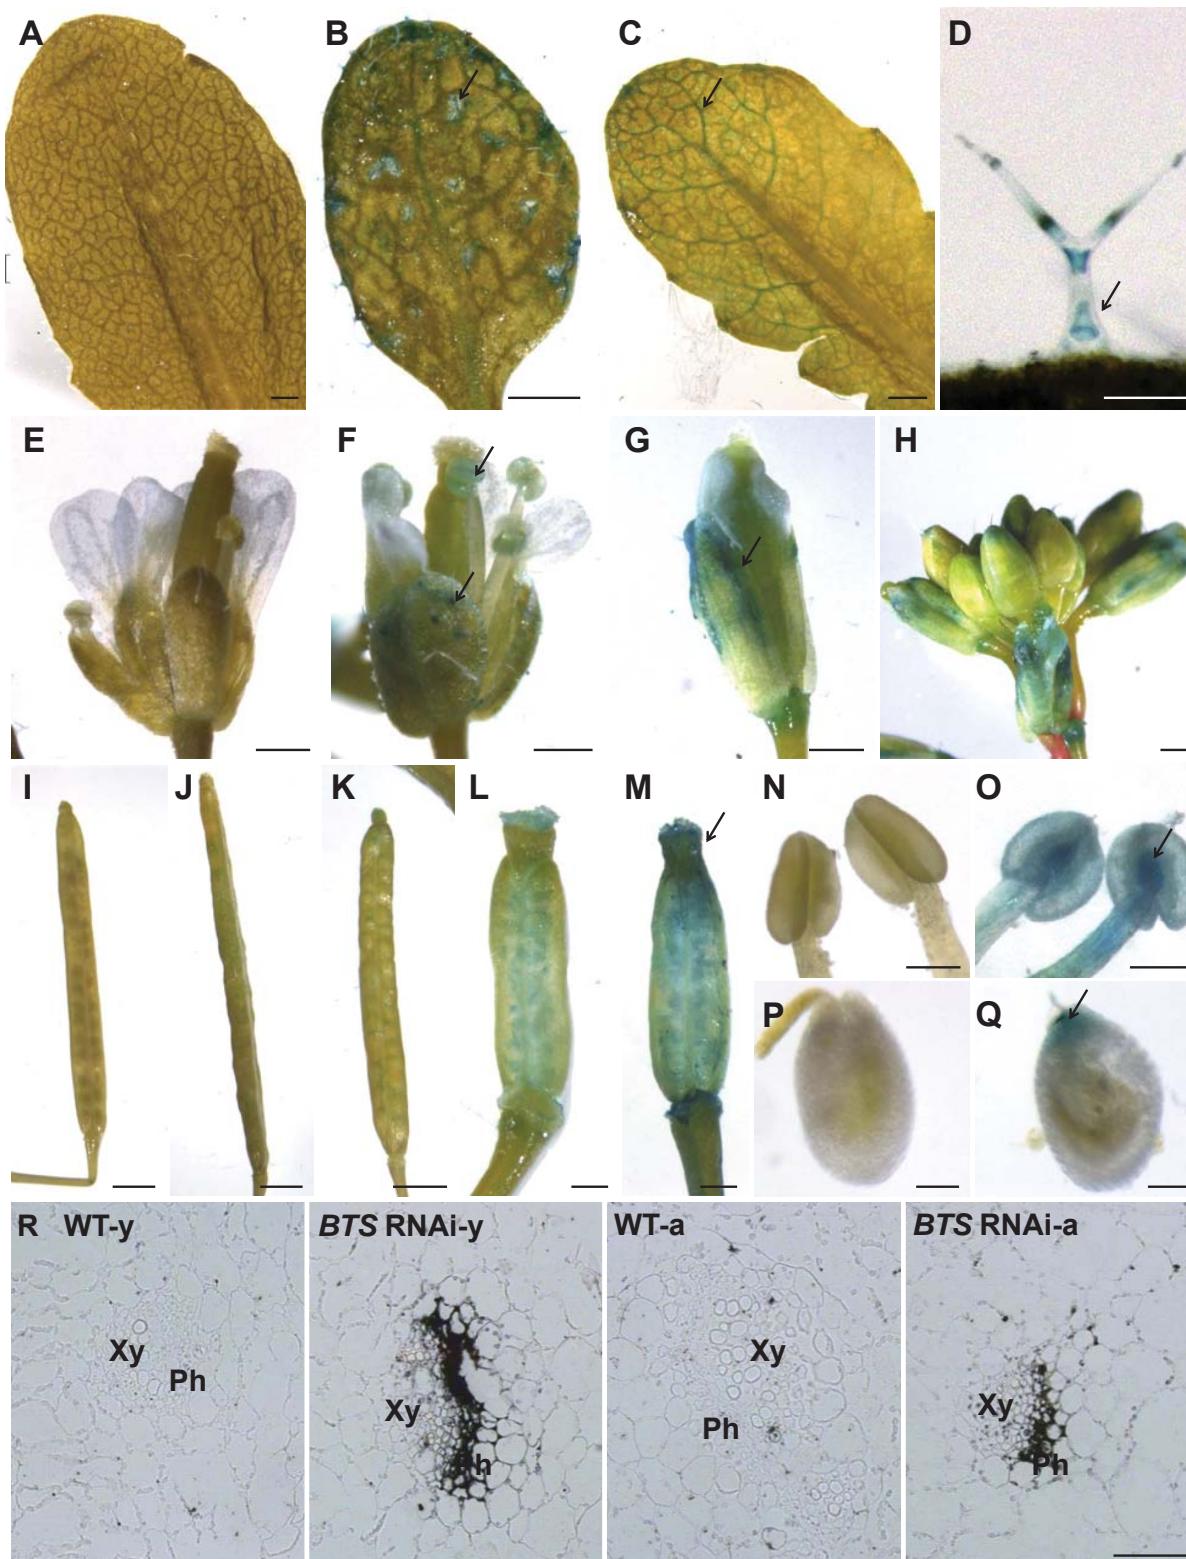

**Supplemental Figure 6. Perls Staining for Fe<sup>3+</sup> of *BTS* RNAi Plants.**

(A-Q) Perls Fe stain signals in rosette leaves (A-C), trichomes (D), flowers (E-H), siliques (I-M), stamens (N-O) and embryos (P-Q) of WT (A, E, I, J, N and P) and *BTS* RNAi plants (B-D, F-H, K-M, O and Q). Bars = 1 mm in A, B, C, I, J and K; 100  $\mu$ m in D, P and Q; 500  $\mu$ m in E, F, G and H; 200  $\mu$ m in L, M, N and O. (R) Perls/DAB stain for Fe<sup>3+</sup> signals in WT and *BTS* RNAi young- (y) and aged- (a) leaves, showing Fe deposits in phloem of the vessels in *BTS* RNAi plants. Ph, phloem; Xy, xylem. Bar = 50  $\mu$ m.

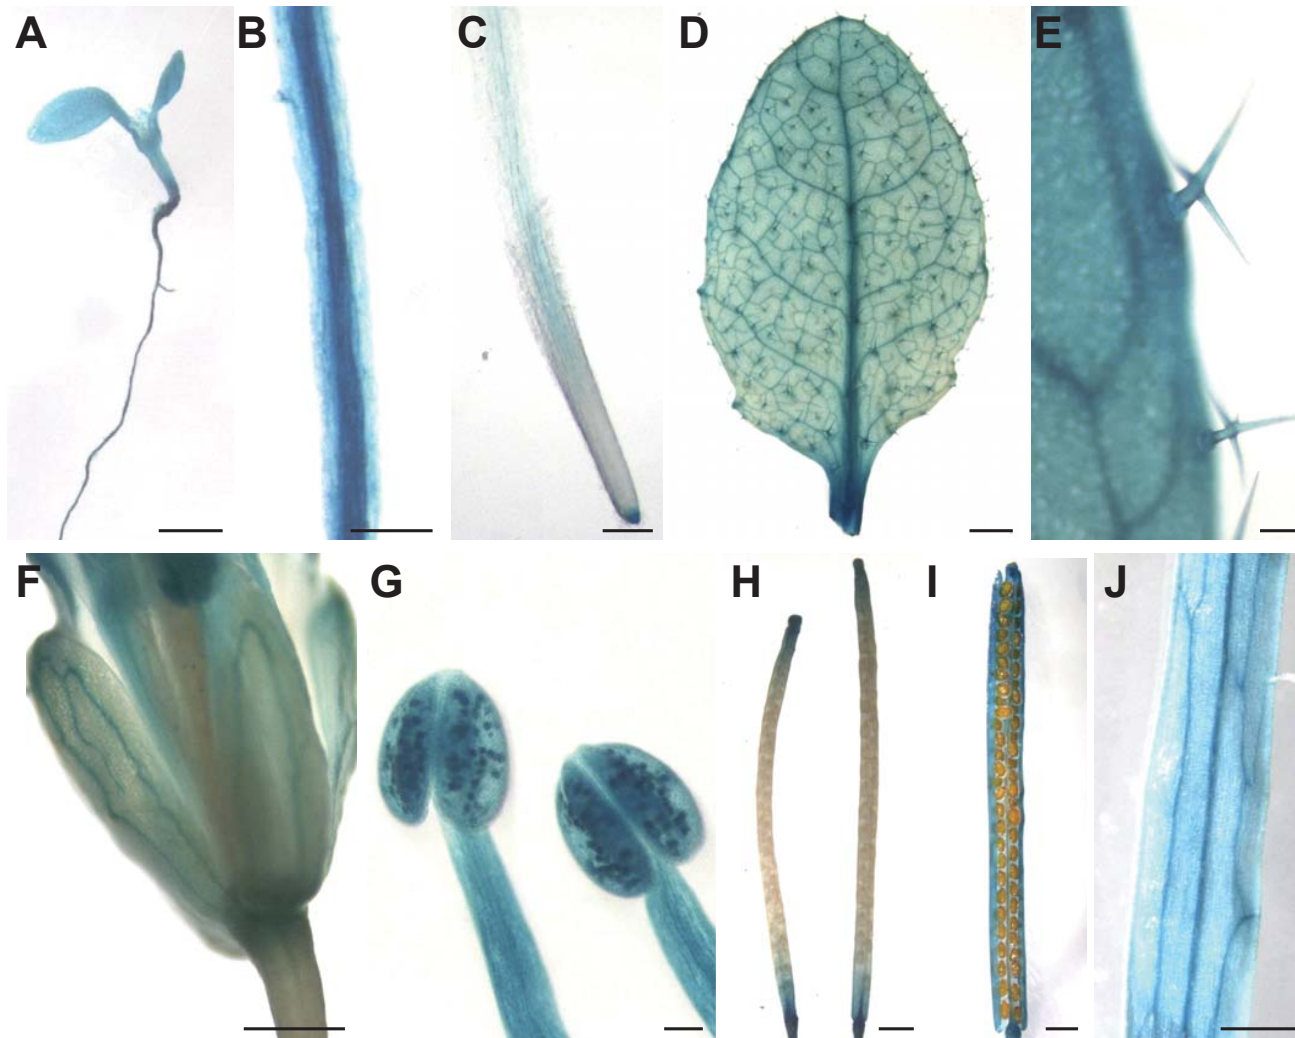

**Supplemental Figure 7. Expression Pattern Analysis of *bHLH104*.**

(A-J) GUS expression in 7-day-old *ProbHLH104:GUS* transgenic seedlings (A-B) and 5- to 7-week-old adult plants grown in soil (C-J), showing GUS accumulation in tissues of leaves (A, D), roots (B, C), trichomes (E), sepals (F), stamens (G), siliques (H, I) and seed pods (J). Bars = 1 mm in A, D, H and I; 100  $\mu$ m in B, C, E and G; 500  $\mu$ m in F and J.



**Supplemental Table 1 Primers Used to Identify of T-DNA Insertion Mutants, Gene Cloning and qPCR**

| <b>Name</b>                      | <b>Sequence</b>                   |
|----------------------------------|-----------------------------------|
| <b>T-DNA identification</b>      |                                   |
| <i>bhlh104-1-F</i>               | GGGGAAAGGTTGTGCTTTTTG             |
| <i>bhlh104-1-R</i>               | GCCTGAGTTCTTGATCACGAG             |
| <i>bhlh104-2-F</i>               | TCATCGGTTTTATTCCGGTCTG            |
| <i>bhlh104-2-R</i>               | GAGGAATAAGCGTGTCTGTG              |
| <i>ilr3-2-F</i>                  | GAATTCAC TAGGTTAATGCCCTG          |
| <i>ilr3-2-R</i>                  | TGCTAAGGTCAAACCATCCAC             |
| <i>ilr3-3-F</i>                  | TCAATCAATTCCTCGAATCAAG            |
| <i>ilr3-3-R</i>                  | CTTGCCACTATACCGATTTTTG            |
| <b>Transcript identification</b> |                                   |
| <i>bHLH104-F</i>                 | ATGTATCCTTCTCTCGACGATGATT         |
| <i>bHLH104-R</i>                 | TTAAGCAGCAGGAGGCCTGAGT            |
| <b>Gene cloning</b>              |                                   |
| <i>bHLH104-F</i>                 | ACTAAGCTTATGTATCCTTCTCTCGACG      |
| <i>bHLH104-R</i>                 | TACCCATGGAGCAGCAGGAGGCCTGA        |
| <i>ILR3-F</i>                    | ACTAAGCTTATGGTGTCAACCGAAAACGC     |
| <i>ILR3-R</i>                    | TACCCATGGAGCAACAGGAGGACGAAGG      |
| <i>GFP-F</i>                     | GGACCATGGGTAGATCTGACTAGTAAAGGA    |
| <i>GFP-R</i>                     | CGTGGATCCTCATTTGTATAGTTTCATCCATGC |
| <i>BTS-RNAi-F-F</i>              | TGAAGCTTCAGAGCTTACTAACTTTGGC      |
| <i>BTS-RNAi-F-R</i>              | ACCTGCAGTTTAGCGAAGAAGATCTCAT      |
| <i>BTS-RNAi-R-F</i>              | ATGTGCGACTTTAGCGAAGAAGATCTCAT     |
| <i>BTS-RNAi-R-R</i>              | ATACGCGTCAGAGCTTACTAACTTTGG       |
| <b>Promoter cloning</b>          |                                   |
| <i>ProbHLH104-F</i>              | GCGAATTCATCTCTCGAATTTATGAAC       |
| <i>ProbHLH104-R</i>              | ATGGATCCTTGAGAGTCTCCAAACAAAT      |
| <b>QPCR</b>                      |                                   |
| <i>FER1-F</i>                    | ACGTTGCTATGAAGGGACTAGC            |
| <i>FER1-R</i>                    | TAGGTGAGACGATAGGGTGGAG            |
| <i>bHLH38-F</i>                  | CGTTCATGTCTTCCAGCTTCTG            |
| <i>bHLH38-R</i>                  | GACCCGATACTCGTACCAAAT             |
| <i>bHLH39-F</i>                  | TCCGTTTATGTCTTCTGCTCT             |
| <i>bHLH39-R</i>                  | CACTTGCTCTTGCAGCTCTGGT            |
| <i>bHLH100-F</i>                 | CTTGTCTTCTCCACCAATCA              |
| <i>bHLH100-R</i>                 | TGCTCTTGCAGCTCTGGTATGT            |
| <i>bHLH101-F</i>                 | ACGCCTTGTACTCTTCACTTCG            |
| <i>bHLH101-R</i>                 | CTTGCTTCTGCTCTGGTATGATTTT         |
| <i>bHLH34-F</i>                  | TCAATTCCTCGTCATCTGTTGGA           |
| <i>bHLH34-R</i>                  | TCAAGTCCATGAACCTTGTCAATTTAG       |
| <i>bHLH104-F</i>                 | CCAGCTGCATTTAACCAACA              |
| <i>bHLH104-R</i>                 | TTAAGCAGCAGGAGGCCTGAG             |
| <i>ILR3-F</i>                    | CACAATCCAAGGTCCTGGTTTT            |
| <i>ILR3-R</i>                    | GGATCCAGGTTCTTTGCTAGCTT           |
| <i>bHLH115-F</i>                 | TACGAAGTGGCTTAGTGATTACCC          |
| <i>bHLH115-R</i>                 | AACCAGTGAAGATTGATTTTGA            |
| <i>PYE-F</i>                     | CAGGACTTCCATTTTCCAA               |
| <i>PYE-R</i>                     | CTTGTGTCTGGGATCAGGT               |
| <i>FIT-F</i>                     | TCGGTCTAGGACTTTGATCTCTG           |
| <i>FIT-R</i>                     | TCTTGAACATACAACACTGCATCT          |
| <i>BTS-F</i>                     | ACCATGTCGATCTCCGGCTG              |
| <i>BTS-R</i>                     | CAAGAGAATATGTTTGCCTACATT          |
| <i>FRO2-F</i>                    | TTCAACGTTTCATGGTCTTTTGT           |
| <i>FRO2-R</i>                    | GAGCTATCTCTCCGGCCAAAT             |
| <i>IRT1-F</i>                    | CTCTTTGCTTCCATCAAATGTTT           |
| <i>IRT1-R</i>                    | CCTAACGCTATCCGAATGG               |
| <i>IRT2-F</i>                    | TCATAGTCACGGTCATGGTGTAG           |
| <i>IRT2-R</i>                    | GAATGAAATAAAATGCCAACCTC           |
| <i>YSL1-F</i>                    | CGAAACCATTACAAGACAAGAG            |
| <i>YSL1-R</i>                    | TTACCTTCCAAGTTACACCCAGAC          |
| <i>NAS4-F</i>                    | TGTTCTTGGCTGCTCTTGTAGG            |
| <i>NAS4-R</i>                    | CAAGGCTCAACGATTGGATAGA            |
| <i>FRD3-F</i>                    | CGTCTAGGGATCATCGGTGCA             |
| <i>FRD3-R</i>                    | TCCCCGAAGTTTGGTGGAAATC            |
| <i>ZIF1-F</i>                    | GCTGTAAGGTGGAGCAGATGAA            |
| <i>ZIF1-R</i>                    | TAGTAGAGGAAGGGATAGAGTGAGG         |
| <i>MYB10-F</i>                   | CACCATGCTGTGACAAAAGCCA            |
| <i>MYB10-R</i>                   | AGACGACAACCTTTCCGCATCT            |
| <i>MYB72-F</i>                   | GGATAAATCTCTGAGACCCGACG           |
| <i>MYB72-R</i>                   | GAGATGCGTGTCCACACGTTT             |
| <i>TUB2-F</i>                    | GGCCTTGTACGATATTTGCTTC            |
| <i>TUB2-R</i>                    | TCGGAGGTCAGAGTTGAGTTGA            |



**Supplemental Table 2 Primers Used in ChIP-qPCR**

| <b>Name</b>              | <b>Sequence</b>            |
|--------------------------|----------------------------|
| <b><i>bHLH38</i></b>     |                            |
| Prob <i>bHLH38</i> -a-F  | AGGATAAATGATAAATGAGAAGCCA  |
| Prob <i>bHLH38</i> -a-R  | CACTCTGATTAATAAAACTGCCTCT  |
| Prob <i>bHLH38</i> -b-F  | CGAATGTTGGAAACTTCATTGATTC  |
| Prob <i>bHLH38</i> -b-R  | TTTTAATCCACAATGACGATGGTC   |
| Prob <i>bHLH38</i> -c-F  | ACAACATAAAAAATGTATGGGACGA  |
| Prob <i>bHLH38</i> -c-R  | TTGTGTAAGAATCAAACATGTATAT  |
| Prob <i>bHLH38</i> -d-F  | CATGTTTGATTCTTACACAATATGC  |
| Prob <i>bHLH38</i> -d-R  | TCGTTGAGATTATATGATTGTGTTAT |
| <b><i>bHLH39</i></b>     |                            |
| Prob <i>bHLH39</i> -a-F  | GGAGGTCAACAAATAAATAAAATGC  |
| Prob <i>bHLH39</i> -a-R  | ACATATTGAAAGATGACTCAGCCTG  |
| Prob <i>bHLH39</i> -b-F  | CCAGTCTACTTGTGACTAGACCTTG  |
| Prob <i>bHLH39</i> -b-R  | AACCAAACTTTAAAAATTCGCAAA   |
| <b><i>bHLH100</i></b>    |                            |
| Prob <i>bHLH100</i> -a-F | AACCGAAGTGTTGTACTGTTTTCGA  |
| Prob <i>bHLH100</i> -a-R | AGATTTATCCATTGATATGTTGGCA  |
| Prob <i>bHLH100</i> -b-F | ATGGGCTACAAACATGTAACTCAT   |
| Prob <i>bHLH100</i> -b-R | TCATTCTATTTACGCCTCTTTAAAT  |
| Prob <i>bHLH100</i> -c-F | AAAATAAACGATAGACACTACACCA  |
| Prob <i>bHLH100</i> -c-R | GGTGGACGTGGACTATTGAGA      |
| Prob <i>bHLH100</i> -d-F | ATTTGCTCGTGCCTCTCAATAGT    |
| Prob <i>bHLH100</i> -d-R | GAATATGCAATCACATTTTTCTACC  |
| Prob <i>bHLH100</i> -e-F | AAGAACATTAGGATATTAATGCCTG  |
| Prob <i>bHLH100</i> -e-R | TAAATAAAATACATTGGGTCACGA   |
| <b><i>bHLH101</i></b>    |                            |
| Prob <i>bHLH101</i> -a-F | ATTTTGGAGATGAAGGTAAAGAG    |
| Prob <i>bHLH101</i> -a-R | TCATCGATCTATATATCCATTTGGA  |
| Prob <i>bHLH101</i> -b-F | TCTTTGGTACGACCCTACGGCT     |
| Prob <i>bHLH101</i> -b-R | AAGGTTCTTTCTTTCACATGTTTTG  |
| Prob <i>bHLH101</i> -c-F | TGAAGGTGATAAACACAAACAGACT  |
| Prob <i>bHLH101</i> -c-R | TGGTATTTCTGACCAGAGTCTAGTT  |
| Prob <i>bHLH101</i> -d-F | TTGATAGTGGATCATTAACTTGTGTA |
| Prob <i>bHLH101</i> -d-R | ATTTACCATTCCAGAGATCCATCC   |
| Prob <i>bHLH101</i> -e-F | ACAGCAAACATAAACTTCATGTGG   |
| Prob <i>bHLH101</i> -e-R | GTTATATTTGAACATGTGAACGCA   |
| <b><i>FIT</i></b>        |                            |
| Pro <i>FIT</i> -a-F      | AGATGTGATAGGTACAGCAAAATTG  |
| Pro <i>FIT</i> -a-R      | ATTTGATACATGTGAAGCTAGCATA  |
| Pro <i>FIT</i> -b-F      | GCTTGTGACAACATAACCAGTTGAC  |
| Pro <i>FIT</i> -b-R      | ATCGATCAGACCGTATTAATAAGGT  |
| Pro <i>FIT</i> -c-F      | CTCTTGTCTTAATCTGCATTCCCT   |
| Pro <i>FIT</i> -c-R      | TACTCGAATGATTAATTTGTCGTG   |
| <b><i>PYE</i></b>        |                            |
| Pro <i>PYE</i> -a-F      | AGTTTCTAACAGATGTTTTCCGG    |
| Pro <i>PYE</i> -a-R      | TTTTCATCAATTGTTTGCATTATAA  |
| Pro <i>PYE</i> -b-F      | GTTTGTGGGAAACACACGACAG     |
| Pro <i>PYE</i> -b-R      | AGATGAAAAGTAACATTTTCACAAAA |
| Pro <i>PYE</i> -c-F      | GAGATGAGCTTTAGTGGCACGC     |
| Pro <i>PYE</i> -c-R      | GAAGGTCCGAAGTTGAGGAGGG     |
| <b><i>TUB2</i></b>       |                            |
| Pro <i>TUB2</i> -F       | TTTCGCTTTCTTGTGGTCAATTAT   |
| Pro <i>TUB2</i> -R       | CTTAACGATCCAAGTTTATGGATTG  |

## Supplemental Methods

### Trypan Blue Staining

To detect leaf necrosis, lactophenol-trypan blue staining was performed, as previously described (van Wees, 2008). *Arabidopsis* leaves were soaked in trypan blue working solution (10 mL phenol, 10 mL glycerol, 10 mL lactic acid, 10 mL distilled water, 80 mL ethanol and 0.02 g trypan blue, Sigma) in a boiling water bath for 5 min and cleared with saturated chloral hydrate solution (800 g of chloral hydrate dissolved in 200 mL distilled water and 100 mL glycerol).

**van Wees, S.** (2008). Phenotypic analysis of *Arabidopsis* mutants: trypan blue stain for fungi, oomycetes, and dead plant cells. CSH Protoc **2008**, pdb prot4982.
